# Supplementary material
Source: publisher figshare collection journal article supplement (https://tandf.figshare.com/ndownloader/files/22664957)
Supplement: Supplementary file 1 [file 22664957]

Supplementary Table 1. pH of starch suspensions before gelatinization.

| **O3 Consumption (mg O3 gstarch-1)** | **pH (Water)** | **pH (Citric Acid)** |
| --- | --- | --- |
| 0 | 5.86 ± 0.08 a | 3.00 ± 0.02 a |
| 78.9 | 3.99 ± 0.08 b | 3.02 ± 0.00 a |
| 145.3 | 3.82 ± 0.03 c | 3.02 ± 0.00 a |
| 270.7 | 3.63 ± 0.02 d | 2.98 ± 0.05 a |
